# Supplementary material for: HAfTs are novel lncRNA transcripts from aflatoxin exposure
Source: PLoS One. 2018 Jan 19;13(1):e0190992. doi: 10.1371/journal.pone.0190992 (PMC5774710; doi:10.1371/journal.pone.0190992)
Supplement: S5 Table — (XLSX) [file pone.0190992.s008.xlsx]

## Sheet: README
Table S5. Mouse and human homologies based on BLAST.
Column	Description
HAFT#	HafT ID
Refseq/Ensembl
Type_of_sequence	experimentally verified or computationally derived or a known LOC?
sequence_id	sequence ID
Rat RNA subject ID (from blastn)	alignment to Rat RNA	top BLAST result (evalue < 0.01)
Rat RNA coverage (from blastn)	alignment to Rat RNA	top BLAST result (evalue < 0.01)
Rat RNA %identity (from blastn)	alignment to Rat RNA	top BLAST result (evalue < 0.01)
Rat RNA subject title (from blastn)	alignment to Rat RNA	top BLAST result (evalue < 0.01)
Mouse RNA subject ID (from blastn)	alignment to Mouse RNA	top BLAST result (evalue < 0.01)
Mouse RNA coverage (from blastn)	alignment to Mouse RNA	top BLAST result (evalue < 0.01)
Mouse RNA %identity (from blastn)	alignment to Mouse RNA	top BLAST result (evalue < 0.01)
Mouse RNA subject title (from blastn)	alignment to Mouse RNA	top BLAST result (evalue < 0.01)
Mouse chromosome subject ID (from blastn)	alignment to Mouse genomic sequence	top 10 BLAST results to the same chromosome are combined (evalue < 0.01)
Mouse chromosome coverage (from blastn)	alignment to Mouse genomic sequence	top 10 BLAST results to the same chromosome are combined (evalue < 0.01)
Mouse chromosome %identity (from blastn)	alignment to Mouse genomic sequence	top 10 BLAST results to the same chromosome are combined (evalue < 0.01)
Mouse chromosome subject title (from blastn)	alignment to Mouse genomic sequence	top 10 BLAST results to the same chromosome are combined (evalue < 0.01)
Human RNA subject ID (from blastn)	alignment to Human RNA	top BLAST result (evalue < 0.01)
Human RNA coverage (from blastn)	alignment to Human RNA	top BLAST result (evalue < 0.01)
Human RNA %identity (from blastn)	alignment to Human RNA	top BLAST result (evalue < 0.01)
Human RNA subject title (from blastn)	alignment to Human RNA	top BLAST result (evalue < 0.01)
Human chromosome subject ID (from blastn)	alignment to Human genomic sequence	top 10 BLAST results to the same chromosome are combined (evalue < 0.01)
Human chromosome coverage (from blastn)	alignment to Human genomic sequence	top 10 BLAST results to the same chromosome are combined (evalue < 0.01)
Human chromosome %identity (from blastn)	alignment to Human genomic sequence	top 10 BLAST results to the same chromosome are combined (evalue < 0.01)
Human chromosome subject title (from blastn)	alignment to Human genomic sequence	top 10 BLAST results to the same chromosome are combined (evalue < 0.01)
Methods
Alignment searches were performed with NCBI’s BLAST suite. HAfT sequences were designated as ‘experimental’ (Sanger sequencing), ‘computational’ (Cufflinks) or ‘Known Loc” (known sequence at a genomic locus). Sequences were aligned to rat, mouse and human RNA and to rat, mouse and human DNA by chromosome search using blastn. For example, the blastn parameters used while aligning to mouse RNA were…
For alignment to RNA sequences, the top search result with a evalue <0.01 is reported.
The RNA transcript can have multiple exons aligning to different non-contiguous regions of a chromosome. So, in the case of alignment to a mouse/human chromosome, we look at the top 10 alignments, retain the non-redundant/non-overlapping alignments to the same chromosome and then summarize the non-contiguous alignment of the query on a specific chromosome.
The NCBI RNA ID or chromosomal location for each sequence from the BLAST result was recorded. The percentage alignment by coverage and identity from the BLAST result are reported. Generally, a 30% threshold was set for transcript homology in rat, mouse and human species.

## Sheet: HAfTs_Mo_Hu_Homology
HAFT#	Refseq/Ensembl	Type_of_sequence	sequence_id	Rat RNA subject ID (from blastn)	Rat RNA coverage (from blastn)	Rat RNA %identity (from blastn)	Rat RNA subject title (from blastn)	Mouse RNA subject ID (from blastn)	Mouse RNA coverage (from blastn)	Mouse RNA %identity (from blastn)	Mouse RNA subject title (from blastn)	Mouse chromosome subject ID (from blastn)	Mouse chromosome coverage (from blastn)	Mouse chromosome %identity (from blastn)	Mouse chromosome subject title (from blastn)	Human RNA subject ID (from blastn)	Human RNA coverage (from blastn)	Human RNA %identity (from blastn)	Human RNA subject title (from blastn)	Human chromosome subject ID (from blastn)	Human chromosome coverage (from blastn)	Human chromosome %identity (from blastn)	Human chromosome subject title (from blastn)
HAfT1	LOC103691380	Experimentally validated sequence	HAfT1_809nt	gi|1004634381|gb|KU697000.1|	100	100	N/A	gi|74193422|dbj|AK047239.1|	13	81.553	Mus musculus 10 days neonate cerebellum cDNA, RIKEN full-length enriched library, clone:B930041E19 product:unclassifiable, full insert sequence	gi|372099091|ref|NC_000085.6|	74	81.6945	Mus musculus strain C57BL/6J chromosome 19, GRCm38.p4 C57BL/6J	gi|34532155|dbj|AK125891.1|	4	94.118	Homo sapiens cDNA FLJ43903 fis, clone TESTI4010211	gi|528476621|ref|NC_018919.2|	4	97.059	Homo sapiens chromosome 8, alternate assembly CHM1_1.1, whole genome shotgun sequence
HAfT1	LOC103691380_1354nt	Computationally derived sequence	Cufflinks_00006229_2440nt	gi|1046847434|ref|XR_590740.2|	60	99.93	N/A	gi|26082122|dbj|AK031056.1|	14	84.66	Mus musculus adult male thymus cDNA, RIKEN full-length enriched library, clone:5832448C19 product:unclassifiable, full insert sequence	gi|372099091|ref|NC_000085.6|	79	74.88	Mus musculus strain C57BL/6J chromosome 19, GRCm38.p4 C57BL/6J	gi|29732|emb|X07024.1|	5	80.16	Homo sapiens mRNA for CCG1 protein	gi|568815588|ref|NC_000010.11|	11	86.385	Homo sapiens chromosome 10, GRCh38.p7 Primary Assembly
HAfT1	LOC103691380_1354nt	Known LOC	LOC103691380_1354nt	gi|1046847434|ref|XR_590740.2|	100	100	N/A	gi|74193422|dbj|AK047239.1|	8	82.52	Mus musculus 10 days neonate cerebellum cDNA, RIKEN full-length enriched library, clone:B930041E19 product:unclassifiable, full insert sequence	gi|372099091|ref|NC_000085.6|	93	80.695	Mus musculus strain C57BL/6J chromosome 19, GRCm38.p4 C57BL/6J	gi|34532155|dbj|AK125891.1|	3	94.12	Homo sapiens cDNA FLJ43903 fis, clone TESTI4010211	gi|568815588|ref|NC_000010.11|	18	86.565	Homo sapiens chromosome 10, GRCh38.p7 Primary Assembly
HAfT2	LOC102549099_506nt	Experimentally validated sequence	HAfT-2_209nt	gi|672028733|ref|XR_340756.2|	72	100	N/A	gi|26090582|dbj|AK044873.1|	63	88.72	Mus musculus 9.5 days embryo parthenogenote cDNA, RIKEN full-length enriched library, clone:B130009H05 product:unclassifiable, full insert sequence	gi|372099101|ref|NC_000075.6|	60	91.27	Mus musculus strain C57BL/6J chromosome 9, GRCm38.p4 C57BL/6J	gi|28611172|gb|BC047344.1|	46	87.63	Homo sapiens, clone IMAGE:5179596, mRNA	0	0	0	0
HAfT2	LOC102549099_506nt	Known LOC	LOC102549099_506nt	gi|672028733|ref|XR_340756.2|	100	100	N/A	gi|26094095|dbj|AK050757.1|	11	93.1	Mus musculus 9 days embryo whole body cDNA, RIKEN full-length enriched library, clone:D030017D16 product:unclassifiable, full insert sequence	gi|372099096|ref|NC_000080.6|	61	86.7667	Mus musculus strain C57BL/6J chromosome 14, GRCm38.p4 C57BL/6J	gi|21758119|dbj|AK098165.1|	7	100	Homo sapiens cDNA FLJ40846 fis, clone TRACH2014544	0	0	0	0
HAfT2	LOC102549099_506nt	Computationally derived sequence	Cufflinks_00021611_1424nt	gi|672028733|ref|XR_340756.2|	28	100	N/A	gi|15929636|gb|BC015253.1|	14	89.11	Mus musculus arachidonate 8-lipoxygenase, mRNA (cDNA clone MGC:18359 IMAGE:4221815), complete cds	gi|372099106|ref|NC_000070.6|	15	90.87	Mus musculus strain C57BL/6J chromosome 4, GRCm38.p4 C57BL/6J	gi|31874823|emb|BX538330.1|	14	81.28	Homo sapiens mRNA; cDNA DKFZp686I14200 (from clone DKFZp686I14200)	gi|568815587|ref|NC_000011.10|	3	92.5	Homo sapiens chromosome 11, GRCh38.p7 Primary Assembly
HAfT3	LOC103690347_973nt	Experimentally validated sequence	HAfT-3_764nt	gi|1046846723|ref|XR_590517.2|	66	100	N/A	gi|52367|emb|V00745.1|	12	92.22	Mouse mRNA fragment (possibly from murin c-gamma-3 immunoglobulin)	gi|372099103|ref|NC_000073.6|	73	89.95	Mus musculus strain C57BL/6J chromosome 7, GRCm38.p4 C57BL/6J	gi|567009|gb|L27636.1|HUMFRA	12	94.44	Homo sapiens (DCIS-1) mRNA fragment	gi|568815588|ref|NC_000010.11|	48	84.435	Homo sapiens chromosome 10, GRCh38.p7 Primary Assembly
HAfT3	LOC103690347_973nt	Known LOC	LOC103690347_973nt	gi|1046846723|ref|XR_590517.2|	100	100	N/A	0	0	0	0	gi|372099103|ref|NC_000073.6|	91	92.105	Mus musculus strain C57BL/6J chromosome 7, GRCm38.p4 C57BL/6J	0	0	0	0	gi|568815588|ref|NC_000010.11|	81	81.395	Homo sapiens chromosome 10, GRCh38.p7 Primary Assembly
HAfT3	LOC103690347_973nt	Computationally derived sequence	Cufflinks_00005778_832nt	gi|1046846723|ref|XR_590517.2|	100	100	N/A	0	0	0	0	gi|372099103|ref|NC_000073.6|	90	92.36	Mus musculus strain C57BL/6J chromosome 7, GRCm38.p4 C57BL/6J	0	0	0	0	gi|568815588|ref|NC_000010.11|	83	81.885	Homo sapiens chromosome 10, GRCh38.p7 Primary Assembly
HAfT4	LOC102549932_877nt_VariantX1	Known LOC	LOC102549932_877nt_VariantX1	gi|672071586|ref|XR_358411.2|	100	100	N/A	gi|26090794|dbj|AK045243.1|	22	86.22	Mus musculus 9.5 days embryo parthenogenote cDNA, RIKEN full-length enriched library, clone:B130050K13 product:unclassifiable, full insert sequence	gi|372099094|ref|NC_000082.6|	100	84.84	Mus musculus strain C57BL/6J chromosome 16, GRCm38.p4 C57BL/6J	0	0	0	0	gi|568815595|ref|NC_000003.12|	35	72.84	Homo sapiens chromosome 3, GRCh38.p7 Primary Assembly
HAfT4	LOC102549932_877nt_VariantX1	Computationally derived sequence	Cufflinks_00014924_1326nt	gi|672071586|ref|XR_358411.2|	64	100	N/A	gi|26090794|dbj|AK045243.1|	12	87.43	Mus musculus 9.5 days embryo parthenogenote cDNA, RIKEN full-length enriched library, clone:B130050K13 product:unclassifiable, full insert sequence	gi|372099094|ref|NC_000082.6|	100	83.89	Mus musculus strain C57BL/6J chromosome 16, GRCm38.p4 C57BL/6J	0	0	0	0	gi|568815595|ref|NC_000003.12|	36	71.73	Homo sapiens chromosome 3, GRCh38.p7 Primary Assembly
HAfT4	LOC102549932_877nt_VariantX1	Experimentally validated sequence	>HAfT4_598nt	gi|672026258|ref|XR_339294.2|	99	98.173	N/A	gi|74182038|dbj|AK157406.1|	27	85.455	Mus musculus activated spleen cDNA, RIKEN full-length enriched library, clone:F830213N11 product:unclassifiable, full insert sequence	gi|372099094|ref|NC_000082.6|	96	88.0135	Mus musculus strain C57BL/6J chromosome 16, GRCm38.p4 C57BL/6J	0	0	0	0	gi|568815595|ref|NC_000003.12|	57	72.434	Homo sapiens chromosome 3, GRCh38.p7 Primary Assembly
HAfT5	LOC103693988_2269nt	Experimentally validated sequence	>HAfT5_410nt	0	0	0	0	0	0	0	0	gi|372099102|ref|NC_000074.6|	99	79.905	Mus musculus strain C57BL/6J chromosome 8, GRCm38.p4 C57BL/6J	0	0	0	0	gi|568815590|ref|NC_000008.11|	52	70	Homo sapiens chromosome 8, GRCh38.p7 Primary Assembly
HAfT5	LOC103693988_2269nt	Known LOC	LOC103693988_2269nt	0	0	0	0	0	0	0	0	gi|372099102|ref|NC_000074.6|	100	80.5067	Mus musculus strain C57BL/6J chromosome 8, GRCm38.p4 C57BL/6J	0	0	0	0	gi|568815590|ref|NC_000008.11|	48	67.76	Homo sapiens chromosome 8, GRCh38.p7 Primary Assembly
HAfT5	LOC103693988_2269nt	Computationally derived sequence	Cufflinks_00024199_2117nt	0	0	0	0	0	0	0	0	gi|372099102|ref|NC_000074.6|	98	80.05	Mus musculus strain C57BL/6J chromosome 8, GRCm38.p4 C57BL/6J	0	0	0	0	gi|568815590|ref|NC_000008.11|	53	67.76	Homo sapiens chromosome 8, GRCh38.p7 Primary Assembly
HAfT6	LOC102552829_484nt_VariantX1	Experimentally validated sequence	HAfT-6_VariantX1_1720nt	gi|1046864916|ref|XR_360571.3|	78	99.63	N/A	0	0	0	0	gi|372099102|ref|NC_000074.6|	79	81.305	Mus musculus strain C57BL/6J chromosome 8, GRCm38.p4 C57BL/6J	gi|1034697042|ref|XR_956783.2|	3	79.69	N/A	gi|568815596|ref|NC_000002.12|	3	92	Homo sapiens chromosome 2, GRCh38.p7 Primary Assembly
HAfT6	LOC102552829_1507nt_VariantX2	Experimentally validated sequence	HAfT-6_VariantX2_1640nt	gi|1046864916|ref|XR_360571.3|	77	99.6	N/A	0	0	0	0	gi|372099102|ref|NC_000074.6|	84	81.085	Mus musculus strain C57BL/6J chromosome 8, GRCm38.p4 C57BL/6J	0	0	0	0	gi|568815596|ref|NC_000002.12|	3	92	Homo sapiens chromosome 2, GRCh38.p7 Primary Assembly
HAfT6	LOC102552829_1507nt_VariantX2	Computationally derived sequence	Cufflinks_00024274_5559nt	gi|1046864916|ref|XR_360571.3|	23	100	N/A	gi|1039780300|ref|XM_017312384.1|	6	81.66	N/A	gi|372099102|ref|NC_000074.6|	77	77.0325	Mus musculus strain C57BL/6J chromosome 8, GRCm38.p4 C57BL/6J	gi|1034694012|ref|XR_001757267.1|	1	94.12	N/A	gi|568815590|ref|NC_000008.11|	7	83.8833	Homo sapiens chromosome 8, GRCh38.p7 Primary Assembly
HAfT6	LOC102552829_1507nt_VariantX2	Known LOC	LOC102552829_1507nt_VariantX2	gi|1046864916|ref|XR_360571.3|	100	100	N/A	0	0	0	0	gi|372099102|ref|NC_000074.6|	89	83.335	Mus musculus strain C57BL/6J chromosome 8, GRCm38.p4 C57BL/6J	gi|1034697042|ref|XR_956783.2|	4	79.69	N/A	gi|568815590|ref|NC_000008.11|	30	71.7033	Homo sapiens chromosome 8, GRCh38.p7 Primary Assembly
HAfT6	LOC102552829_484nt_VariantX1	Computationally derived sequence	Cufflinks_00024116_528nt	gi|1046864915|ref|XR_596518.2|	47	100	N/A	0	0	0	0	gi|372099102|ref|NC_000074.6|	56	85.05	Mus musculus strain C57BL/6J chromosome 8, GRCm38.p4 C57BL/6J	0	0	0	0	gi|568815590|ref|NC_000008.11|	35	70.31	Homo sapiens chromosome 8, GRCh38.p7 Primary Assembly
HAfT6	LOC102552829_484nt_VariantX1	Known LOC	LOC102552829_484nt_VariantX1	gi|1046864915|ref|XR_596518.2|	100	100	N/A	0	0	0	0	gi|372099102|ref|NC_000074.6|	98	86.37	Mus musculus strain C57BL/6J chromosome 8, GRCm38.p4 C57BL/6J	gi|1034697042|ref|XR_956783.2|	12	79.69	N/A	gi|568815590|ref|NC_000008.11|	80	71.345	Homo sapiens chromosome 8, GRCh38.p7 Primary Assembly
HAfT7	LOC102555869_VariantX1_1695nt	Experimentally validated sequence	HAfT-7_VariantX1_383nt	gi|1046866581|ref|XR_360823.3|	100	100	N/A	gi|1039742751|ref|XR_001780661.1|	45	76.74	N/A	gi|372099109|ref|NC_000067.6|	53	83.17	Mus musculus strain C57BL/6J chromosome 1, GRCm38.p4 C57BL/6J	0	0	0	0	0	0	0	0
HAfT7	LOC102555869_VariantX1_1695nt	Computationally derived sequence	Cufflinks_00037591_4007nt	gi|1046866581|ref|XR_360823.3|	36	100	N/A	gi|1039742751|ref|XR_001780661.1|	4	76.57	N/A	gi|372099097|ref|NC_000079.6|	100	82.232	Mus musculus strain C57BL/6J chromosome 13, GRCm38.p4 C57BL/6J	gi|1034680887|ref|XR_959929.2|	3	74.05	N/A	gi|568815585|ref|NC_000013.11|	3	76.43	Homo sapiens chromosome 13, GRCh38.p7 Primary Assembly
HAfT7	LOC102555869_VariantX1_1695nt	Known LOC	LOC102555869_VariantX1_1695nt	gi|1046866581|ref|XR_360823.3|	100	100	N/A	gi|1039742751|ref|XR_001780661.1|	10	76.57	N/A	gi|372099097|ref|NC_000079.6|	98	82.185	Mus musculus strain C57BL/6J chromosome 13, GRCm38.p4 C57BL/6J	gi|1034680887|ref|XR_959929.2|	8	74.05	N/A	gi|568815585|ref|NC_000013.11|	8	76.43	Homo sapiens chromosome 13, GRCh38.p7 Primary Assembly
HAfT7	LOC102555869_VariantX2_1617nt	Known LOC	LOC102555869_VariantX2_1617nt	gi|1046866581|ref|XR_360823.3|	59	100	N/A	gi|1039742751|ref|XR_001780661.1|	11	76.57	N/A	gi|372099097|ref|NC_000079.6|	97	82.055	Mus musculus strain C57BL/6J chromosome 13, GRCm38.p4 C57BL/6J	gi|1034680887|ref|XR_959929.2|	8	74.05	N/A	gi|568815585|ref|NC_000013.11|	9	76.43	Homo sapiens chromosome 13, GRCh38.p7 Primary Assembly
HAfT7	LOC102555869	Experimentally validated sequence	HAfT-7_VariantX3_749nt	gi|1046866581|ref|XR_360823.3|	100	91.59	N/A	gi|1039742751|ref|XR_001780661.1|	23	76.74	N/A	gi|372099097|ref|NC_000079.6|	82	83.7967	Mus musculus strain C57BL/6J chromosome 13, GRCm38.p4 C57BL/6J	0	0	0	0	gi|568815589|ref|NC_000009.12|	23	70.56	Homo sapiens chromosome 9, GRCh38.p7 Primary Assembly
HAfT7	LOC102555869_VariantX2_1617nt	Experimentally validated sequence	HAfT-7_VariantX2_656nt	gi|1046866581|ref|XR_360823.3|	67	100	N/A	gi|1039742751|ref|XR_001780661.1|	26	76.74	N/A	gi|372099097|ref|NC_000079.6|	96	83.9467	Mus musculus strain C57BL/6J chromosome 13, GRCm38.p4 C57BL/6J	0	0	0	0	gi|568815589|ref|NC_000009.12|	33	69.3	Homo sapiens chromosome 9, GRCh38.p7 Primary Assembly
HAfT8	LOC102554927/LOC103694063	Experimentally validated sequence	HAfT-8_VariantX3_663nt	gi|1046825525|ref|XR_001834251.1|	100	94.87	N/A	gi|30704493|gb|BC052176.1|	11	87.01	Mus musculus cDNA clone IMAGE:6507076, containing frame-shift errors	gi|372099097|ref|NC_000079.6|	71	85.38	Mus musculus strain C57BL/6J chromosome 13, GRCm38.p4 C57BL/6J	gi|49257496|gb|BC073878.1|	10	89.55	Homo sapiens kinesin family member C1, mRNA (cDNA clone IMAGE:3914750)	gi|568815581|ref|NC_000017.11|	9	90	Homo sapiens chromosome 17, GRCh38.p7 Primary Assembly
HAfT8	LOC102554927_1083nt	Experimentally validated sequence	HAfT-8_VariantX1_1587nt	gi|1046866860|ref|XR_596705.2|	77	99.59	N/A	gi|755544920|ref|XR_382269.2|	33	82.23	N/A	gi|372099097|ref|NC_000079.6|	77	83.8567	Mus musculus strain C57BL/6J chromosome 13, GRCm38.p4 C57BL/6J	0	0	0	0	gi|568815592|ref|NC_000006.12|	14	70.8	Homo sapiens chromosome 6, GRCh38.p7 Primary Assembly
HAfT8	LOC103694063_4749nt	Experimentally validated sequence	HAfT-8_VariantX2_1501nt	gi|1046866860|ref|XR_596705.2|	76	99.56	N/A	gi|755544920|ref|XR_382269.2|	35	82.23	N/A	gi|372099097|ref|NC_000079.6|	77	82.45	Mus musculus strain C57BL/6J chromosome 13, GRCm38.p4 C57BL/6J	0	0	0	0	gi|568815592|ref|NC_000006.12|	15	70.8	Homo sapiens chromosome 6, GRCh38.p7 Primary Assembly
HAfT8	LOC102554927_1083nt	Computationally derived sequence	Cufflinks_00026037_1707nt	gi|672029892|ref|XM_008773945.1|	8	100	N/A	gi|1039744657|ref|XR_873323.2|	57	82.96	N/A	gi|372099097|ref|NC_000079.6|	100	82.745	Mus musculus strain C57BL/6J chromosome 13, GRCm38.p4 C57BL/6J	gi|7021091|dbj|AK000789.1|	9	75.66	Homo sapiens cDNA FLJ20782 fis, clone COL03841	gi|568815584|ref|NC_000014.9|	19	69.21	Homo sapiens chromosome 14, GRCh38.p7 Primary Assembly
HAfT8	LOC102554927_1083nt	Computationally derived sequence	>Cufflinks_00025137_8415nt	gi|1046866860|ref|XR_596705.2|	51	100	N/A	gi|755544920|ref|XR_382269.2|	6	82.231	N/A	gi|372099097|ref|NC_000079.6|	93	81.3667	Mus musculus strain C57BL/6J chromosome 13, GRCm38.p4 C57BL/6J	gi|34535367|dbj|AK128141.1|	1	75.556	Homo sapiens cDNA FLJ46262 fis, clone TESTI4025401	gi|568815592|ref|NC_000006.12|	38	71.1065	Homo sapiens chromosome 6, GRCh38.p7 Primary Assembly
HAfT8	LOC103694063_4749nt	Known LOC	LOC103694063_4749nt	gi|1046866860|ref|XR_596705.2|	100	100	N/A	gi|755544920|ref|XR_382269.2|	11	82.23	N/A	gi|372099097|ref|NC_000079.6|	94	84.6	Mus musculus strain C57BL/6J chromosome 13, GRCm38.p4 C57BL/6J	gi|34535367|dbj|AK128141.1|	2	75.56	Homo sapiens cDNA FLJ46262 fis, clone TESTI4025401	gi|528476637|ref|NC_018917.2|	47	74.77	Homo sapiens chromosome 6, alternate assembly CHM1_1.1, whole genome shotgun sequence
HAfT8	LOC102554927_1083nt	Known LOC	LOC102554927_1083nt	gi|1046866861|ref|XR_596706.2|	100	100	N/A	0	0	0	0	gi|372099097|ref|NC_000079.6|	86	86.5	Mus musculus strain C57BL/6J chromosome 13, GRCm38.p4 C57BL/6J	gi|1034681598|ref|XR_001731885.1|	2	100	N/A	gi|568815592|ref|NC_000006.12|	78	74.2	Homo sapiens chromosome 6, GRCh38.p7 Primary Assembly
HAfT9	LOC103694221_5009nt	Computationally derived sequence	Cufflinks_00027620_1621nt	gi|1046869013|ref|XR_597004.2|	93	100	N/A	gi|328447192|ref|NR_038088.1|	6	96	Mus musculus brain cytoplasmic RNA 1 (Bc1), long non-coding RNA	gi|372099092|ref|NC_000084.6|	86	85.5033	Mus musculus strain C57BL/6J chromosome 18, GRCm38.p4 C57BL/6J	gi|21758119|dbj|AK098165.1|	7	86.18	Homo sapiens cDNA FLJ40846 fis, clone TRACH2014544	gi|568815593|ref|NC_000005.10|	49	83.0633	Homo sapiens chromosome 5, GRCh38.p7 Primary Assembly
HAfT9	LOC103694221_5009nt	Experimentally validated sequence	HAfT-9_495nt	gi|1046869013|ref|XR_597004.2|	100	99.8	N/A	gi|328447192|ref|NR_038088.1|	20	95.88	Mus musculus brain cytoplasmic RNA 1 (Bc1), long non-coding RNA	gi|372099092|ref|NC_000084.6|	77	87.155	Mus musculus strain C57BL/6J chromosome 18, GRCm38.p4 C57BL/6J	gi|21758119|dbj|AK098165.1|	24	86.18	Homo sapiens cDNA FLJ40846 fis, clone TRACH2014544	gi|568815593|ref|NC_000005.10|	50	90.205	Homo sapiens chromosome 5, GRCh38.p7 Primary Assembly
HAfT9	LOC103694221_5009nt	Known LOC	LOC103694221_5009nt	gi|1046869013|ref|XR_597004.2|	73	99.95	N/A	gi|328447192|ref|NR_038088.1|	2	96	Mus musculus brain cytoplasmic RNA 1 (Bc1), long non-coding RNA	gi|372099092|ref|NC_000084.6|	97	84.205	Mus musculus strain C57BL/6J chromosome 18, GRCm38.p4 C57BL/6J	gi|21758119|dbj|AK098165.1|	2	86.18	Homo sapiens cDNA FLJ40846 fis, clone TRACH2014544	gi|568815593|ref|NC_000005.10|	53	79.7225	Homo sapiens chromosome 5, GRCh38.p7 Primary Assembly
HAfT10	LOC102554057_VariantX6_3666nt	Experimentally validated sequence	HAfT-10_VariantX1_375nt	gi|1046874328|ref|XR_001836586.1|	80	99.67	N/A	0	0	0	0	gi|372099097|ref|NC_000079.6|	21	83.33	Mus musculus strain C57BL/6J chromosome 13, GRCm38.p4 C57BL/6J	0	0	0	0	gi|568815593|ref|NC_000005.10|	22	76.74	Homo sapiens chromosome 5, GRCh38.p7 Primary Assembly
HAfT10	LOC102554057	Experimentally validated sequence	HAfT-10_VariantX2_342nt	gi|1046874328|ref|XR_001836586.1|	78	99.62	N/A	0	0	0	0	gi|372099097|ref|NC_000079.6|	23	83.33	Mus musculus strain C57BL/6J chromosome 13, GRCm38.p4 C57BL/6J	0	0	0	0	gi|568815593|ref|NC_000005.10|	25	76.74	Homo sapiens chromosome 5, GRCh38.p7 Primary Assembly
HAfT10	LOC102554057_VariantX6_3666nt	Known LOC	LOC102554057_VariantX6_3666nt	gi|1046874326|ref|XR_351399.3|	100	100	N/A	gi|1039744317|ref|XM_011244427.2|	2	82.19	N/A	gi|372099097|ref|NC_000079.6|	45	79.2067	Mus musculus strain C57BL/6J chromosome 13, GRCm38.p4 C57BL/6J	0	0	0	0	gi|568815593|ref|NC_000005.10|	32	73.902	Homo sapiens chromosome 5, GRCh38.p7 Primary Assembly
HAfT10	LOC102554057	Computationally derived sequence	Cufflinks_00030744_1853nt	gi|1046874327|ref|XR_001836585.1|	76	100	N/A	gi|1039744317|ref|XM_011244427.2|	4	82.19	N/A	gi|372099097|ref|NC_000079.6|	26	79.69	Mus musculus strain C57BL/6J chromosome 13, GRCm38.p4 C57BL/6J	0	0	0	0	gi|568815593|ref|NC_000005.10|	36	67.35	Homo sapiens chromosome 5, GRCh38.p7 Primary Assembly
HAfT10	LOC102554057_VariantX6_3666nt	Computationally derived sequence	Cufflinks_00032581_482nt	gi|1046874328|ref|XR_001836586.1|	93	100	N/A	0	0	0	0	0	0	0	0	0	0	0	0	gi|568815593|ref|NC_000005.10|	87	68.23	Homo sapiens chromosome 5, GRCh38.p7 Primary Assembly
HAfT11	LOC102547196_1425nt	Computationally derived sequence	Cufflinks_00029308_1820nt	gi|672031444|ref|XR_342420.2|	56	100	N/A	gi|1039791382|ref|XR_879017.2|	8	82.12	N/A	gi|372099102|ref|NC_000074.6|	81	79.3167	Mus musculus strain C57BL/6J chromosome 8, GRCm38.p4 C57BL/6J	0	0	0	0	0	0	0	0
HAfT11	LOC102547196_1425nt	Known LOC	LOC102547196_1425nt	gi|672031444|ref|XR_342420.2|	100	100	N/A	gi|1039791382|ref|XR_879017.2|	11	82.12	N/A	gi|372099102|ref|NC_000074.6|	84	78.64	Mus musculus strain C57BL/6J chromosome 8, GRCm38.p4 C57BL/6J	gi|31874823|emb|BX538330.1|	3	90.24	Homo sapiens mRNA; cDNA DKFZp686I14200 (from clone DKFZp686I14200)	0	0	0	0
HAfT12	LOC102555623_VariantX2_4882nt	Computationally derived sequence	Cufflinks_00032865_1175nt	gi|1046828570|ref|XR_344707.3|	100	100	N/A	gi|326381138|ref|NR_037975.1|	11	89.6	Mus musculus predicted gene 5105 (Gm5105), long non-coding RNA	gi|372099107|ref|NC_000069.6|	67	82.66	Mus musculus strain C57BL/6J chromosome 3, GRCm38.p4 C57BL/6J	0	0	0	0	gi|568815594|ref|NC_000004.12|	12	70.75	Homo sapiens chromosome 4, GRCh38.p7 Primary Assembly
HAfT12	LOC102555623_VariantX2_4882nt	Known LOC	LOC102555623_VariantX2_4882nt	gi|672044391|ref|XR_352069.2|	100	100	N/A	gi|326381138|ref|NR_037975.1|	3	89.6	Mus musculus predicted gene 5105 (Gm5105), long non-coding RNA	gi|372099107|ref|NC_000069.6|	93	76.87	Mus musculus strain C57BL/6J chromosome 3, GRCm38.p4 C57BL/6J	0	0	0	0	gi|568815594|ref|NC_000004.12|	16	72.3333	Homo sapiens chromosome 4, GRCh38.p7 Primary Assembly
HAfT12	LOC102555623	Computationally derived sequence	Cufflinks_00033179_2265nt	gi|1046875806|ref|XR_591366.2|	100	100	N/A	0	0	0	0	gi|372099107|ref|NC_000069.6|	88	77.47	Mus musculus strain C57BL/6J chromosome 3, GRCm38.p4 C57BL/6J	0	0	0	0	gi|568815594|ref|NC_000004.12|	22	72.64	Homo sapiens chromosome 4, GRCh38.p7 Primary Assembly
HAfT13	LOC102548205_2545nt	Computationally derived sequence	Cufflinks_00035253_1571nt	gi|1046877381|ref|XR_362127.3|	100	100	N/A	gi|74209646|dbj|AK138174.1|	17	73.26	Mus musculus adult male hypothalamus cDNA, RIKEN full-length enriched library, clone:A230024L23 product:unclassifiable, full insert sequence	gi|372099100|ref|NC_000076.6|	70	73.4767	Mus musculus strain C57BL/6J chromosome 10, GRCm38.p4 C57BL/6J	gi|551887795|tpe|HG510127.1|	5	85.33	TPA: Homo sapiens RP11-510D19.1 gene for long non-coding RNA OTTHUMT00000431624.1, lincRNA	gi|568815597|ref|NC_000001.11|	5	88.24	Homo sapiens chromosome 1, GRCh38.p7 Primary Assembly
HAfT13	LOC102548205_2545nt	Known LOC	LOC102548205_2545nt	gi|1046877381|ref|XR_362127.3|	99	100	N/A	gi|74209646|dbj|AK138174.1|	11	73.26	Mus musculus adult male hypothalamus cDNA, RIKEN full-length enriched library, clone:A230024L23 product:unclassifiable, full insert sequence	gi|372099100|ref|NC_000076.6|	61	77.53	Mus musculus strain C57BL/6J chromosome 10, GRCm38.p4 C57BL/6J	gi|551887795|tpe|HG510127.1|	3	85.33	TPA: Homo sapiens RP11-510D19.1 gene for long non-coding RNA OTTHUMT00000431624.1, lincRNA	gi|568815588|ref|NC_000010.11|	37	79.9467	Homo sapiens chromosome 10, GRCh38.p7 Primary Assembly
HAfT14	LOC100910558_Variant1_1713nt	Known LOC	LOC100910558_Variant1_1713nt	gi|586804697|ref|NR_110678.1|	100	100	N/A	gi|1042998947|ref|NR_137202.1|	62	78.2	N/A	gi|372099106|ref|NC_000070.6|	88	84.4767	Mus musculus strain C57BL/6J chromosome 4, GRCm38.p4 C57BL/6J	gi|551866518|tpe|HG501902.1|	15	84.41	TPA: Homo sapiens RP11-120J1.1 gene for long non-coding RNA OTTHUMT00000051744.1, antisense	gi|568815589|ref|NC_000009.12|	29	78.54	Homo sapiens chromosome 9, GRCh38.p7 Primary Assembly
HAfT14	LOC100910558_Variant2_1399nt	Known LOC	LOC100910558_Variant2_1399nt	gi|586804587|ref|NR_110679.1|	100	100	N/A	gi|1042998947|ref|NR_137202.1|	94	80.22	N/A	gi|372099106|ref|NC_000070.6|	77	78.55	Mus musculus strain C57BL/6J chromosome 4, GRCm38.p4 C57BL/6J	gi|551866518|tpe|HG501902.1|	18	84.82	TPA: Homo sapiens RP11-120J1.1 gene for long non-coding RNA OTTHUMT00000051744.1, antisense	gi|568815589|ref|NC_000009.12|	34	78.6633	Homo sapiens chromosome 9, GRCh38.p7 Primary Assembly
HAfT14	LOC100910558_Variant1_1713nt	Computationally derived sequence	Cufflinks_00047409_1350nt	gi|586804555|ref|NR_110680.1|	100	100	N/A	gi|1042998947|ref|NR_137202.1|	96	81.44	N/A	gi|372099106|ref|NC_000070.6|	78	78.26	Mus musculus strain C57BL/6J chromosome 4, GRCm38.p4 C57BL/6J	gi|551866518|tpe|HG501902.1|	22	82.08	TPA: Homo sapiens RP11-120J1.1 gene for long non-coding RNA OTTHUMT00000051744.1, antisense	gi|568815589|ref|NC_000009.12|	35	78.57	Homo sapiens chromosome 9, GRCh38.p7 Primary Assembly
HAfT14	LOC100910558_Variant3_1379nt	Known LOC	LOC100910558_Variant3_1379nt	gi|586804555|ref|NR_110680.1|	100	100	N/A	gi|1042998947|ref|NR_137202.1|	94	81.44	N/A	gi|372099106|ref|NC_000070.6|	77	78.26	Mus musculus strain C57BL/6J chromosome 4, GRCm38.p4 C57BL/6J	gi|551866518|tpe|HG501902.1|	21	82.08	TPA: Homo sapiens RP11-120J1.1 gene for long non-coding RNA OTTHUMT00000051744.1, antisense	gi|568815589|ref|NC_000009.12|	35	78.54	Homo sapiens chromosome 9, GRCh38.p7 Primary Assembly
HAfT15	LOC102552388_VariantX1_968nt	Known LOC	LOC102552388_VariantX1_968nt	gi|1046894370|ref|XR_355172.3|	100	100	N/A	gi|74217612|dbj|AK156032.1|	14	72.79	Mus musculus activated spleen cDNA, RIKEN full-length enriched library, clone:F830004P11 product:unclassifiable, full insert sequence	gi|372099098|ref|NC_000078.6|	89	76.61	Mus musculus strain C57BL/6J chromosome 12, GRCm38.p4 C57BL/6J	0	0	0	0	gi|568815582|ref|NC_000016.10|	8	75.58	Homo sapiens chromosome 16, GRCh38.p7 Primary Assembly
HAfT15	LOC102552388_VariantX2_794nt	Known LOC	LOC102552388_VariantX2_794nt	gi|1046894372|ref|XR_593212.2|	100	100	N/A	gi|74217612|dbj|AK156032.1|	17	72.79	Mus musculus activated spleen cDNA, RIKEN full-length enriched library, clone:F830004P11 product:unclassifiable, full insert sequence	gi|372099098|ref|NC_000078.6|	80	77.94	Mus musculus strain C57BL/6J chromosome 12, GRCm38.p4 C57BL/6J	0	0	0	0	gi|568815582|ref|NC_000016.10|	10	75.58	Homo sapiens chromosome 16, GRCh38.p7 Primary Assembly
HAfT15	LOC102552388_VariantX1_968nt	Computationally derived sequence	Cufflinks_00048965_3008nt	gi|1046894370|ref|XR_355172.3|	33	100	N/A	gi|35193123|gb|BC058624.1|	4	90.4	Mus musculus coiled-coil domain containing 36, mRNA (cDNA clone IMAGE:5716219), partial cds	gi|372099098|ref|NC_000078.6|	95	80.5025	Mus musculus strain C57BL/6J chromosome 12, GRCm38.p4 C57BL/6J	gi|21758119|dbj|AK098165.1|	4	85.09	Homo sapiens cDNA FLJ40846 fis, clone TRACH2014544	gi|568815584|ref|NC_000014.9|	13	82.23	Homo sapiens chromosome 14, GRCh38.p7 Primary Assembly
HAfT16	LOC102553833	Computationally derived sequence	Cufflinks_00057006_3621nt	gi|1046901562|ref|XR_356107.3|	28	100	N/A	gi|74180714|dbj|AK143874.1|	9	72.73	Mus musculus 6 days neonate spleen cDNA, RIKEN full-length enriched library, clone:F430213J10 product:hypothetical protein, full insert sequence	gi|372099101|ref|NC_000075.6|	68	75.95	Mus musculus strain C57BL/6J chromosome 9, GRCm38.p4 C57BL/6J	0	0	0	0	gi|568815587|ref|NC_000011.10|	1	82.35	Homo sapiens chromosome 11, GRCh38.p7 Primary Assembly
HAfT16	LOC102553833_5941nt	Computationally derived sequence	Cufflinks_00055698_7580nt	gi|1046901562|ref|XR_356107.3|	39	100	N/A	gi|26085039|dbj|AK036126.1|	3	77.36	Mus musculus 16 days neonate cerebellum cDNA, RIKEN full-length enriched library, clone:9630038B04 product:unclassifiable, full insert sequence	gi|372099101|ref|NC_000075.6|	68	83.665	Mus musculus strain C57BL/6J chromosome 9, GRCm38.p4 C57BL/6J	gi|685844789|tpe|LN608941.1|	1	83.67	N/A	gi|568815587|ref|NC_000011.10|	19	74.4867	Homo sapiens chromosome 11, GRCh38.p7 Primary Assembly
HAfT16	LOC102553833_5941nt	Known LOC	LOC102553833_5941nt	gi|1046901562|ref|XR_356107.3|	99	100	N/A	0	0	0	0	gi|372099101|ref|NC_000075.6|	85	87.895	Mus musculus strain C57BL/6J chromosome 9, GRCm38.p4 C57BL/6J	0	0	0	0	gi|568815587|ref|NC_000011.10|	48	71.8775	Homo sapiens chromosome 11, GRCh38.p7 Primary Assembly
HAfT17	LOC108349448_VariantX1	Computationally derived sequence	Cufflinks_00006612_258nt	gi|1046846365|ref|XR_001835907.1|	97	100	N/A	gi|1039780978|ref|XR_001778223.1|	63	88.89	N/A	gi|372099103|ref|NC_000073.6|	82	91.445	Mus musculus strain C57BL/6J chromosome 7, GRCm38.p4 C57BL/6J	0	0	0	0	0	0	0	0
HAfT17	LOC108349448_VariantX1	Known LOC	>LOC108349448_VariantX1_283nt	gi|1046846365|ref|XR_001835907.1|	100	100	N/A	gi|1039780978|ref|XR_001778223.1|	58	89.024	N/A	gi|372099103|ref|NC_000073.6|	80	84.367	Mus musculus strain C57BL/6J chromosome 7, GRCm38.p4 C57BL/6J	0	0	0	0	0	0	0	0
HAfT17	LOC108349448_VariantX2	Known LOC	>LOC108349448_VariantX2_619nt	gi|1046818058|ref|XR_001835418.1|	100	100	N/A	gi|1039780978|ref|XR_001778223.1|	26	89.024	N/A	gi|372099103|ref|NC_000073.6|	95	83.0177	Mus musculus strain C57BL/6J chromosome 7, GRCm38.p4 C57BL/6J	0	0	0	0	0	0	0	0
HAfT18	NOVEL lncRNA	Computationally derived sequence	Cufflinks_00036996_5428nt	gi|298904906|emb|FQ231867.1|	4	80.56	Rattus norvegicus TL0AEA67YO03 mRNA sequence	gi|74149250|dbj|AK135073.1|	4	84.96	Mus musculus adult male olfactory brain cDNA, RIKEN full-length enriched library, clone:6430570L05 product:hypothetical Phosphoenolpyruvate carboxykinase, N-terminal containing protein, full insert sequence	gi|372099108|ref|NC_000068.7|	91	77.93	Mus musculus strain C57BL/6J chromosome 2, GRCm38.p4 C57BL/6J	gi|1034671477|ref|XR_001746388.1|	2	77.65	N/A	gi|568815588|ref|NC_000010.11|	12	74.35	Homo sapiens chromosome 10, GRCh38.p7 Primary Assembly
HAfT19	NOVEL lncRNA	Experimentally validated sequence	HAfT-19_VariantX1_477nt	gi|672083331|ref|XM_006254746.2|	30	92.2	N/A	gi|755530671|ref|XR_870792.1|	29	73.65	N/A	gi|372099097|ref|NC_000079.6|	58	82.1	Mus musculus strain C57BL/6J chromosome 13, GRCm38.p4 C57BL/6J	0	0	0	0	0	0	0	0
HAfT19	NOVEL lncRNA	Experimentally validated sequence	HAfT-19_VariantX2_447nt	gi|672083331|ref|XM_006254746.2|	32	92.25	N/A	gi|755530671|ref|XR_870792.1|	31	73.65	N/A	gi|372099097|ref|NC_000079.6|	62	82.1	Mus musculus strain C57BL/6J chromosome 13, GRCm38.p4 C57BL/6J	0	0	0	0	0	0	0	0
HAfT19	NOVEL lncRNA	Experimentally validated sequence	HAfT-19_VariantX3_308nt	gi|672083331|ref|XM_006254746.2|	46	92.2	N/A	0	0	0	0	gi|372099097|ref|NC_000079.6|	53	88.41	Mus musculus strain C57BL/6J chromosome 13, GRCm38.p4 C57BL/6J	0	0	0	0	0	0	0	0
HAfT19	NOVEL lncRNA	Computationally derived sequence	Cufflinks_00026127_939nt	gi|672083331|ref|XM_006254746.2|	14	93.13	N/A	gi|755530671|ref|XR_870792.1|	15	73.65	N/A	gi|372099097|ref|NC_000079.6|	46	82.085	Mus musculus strain C57BL/6J chromosome 13, GRCm38.p4 C57BL/6J	0	0	0	0	gi|568815591|ref|NC_000007.14|	28	75.75	Homo sapiens chromosome 7, GRCh38.p7 Primary Assembly
HAfT20	NOVEL lncRNA	Experimentally validated sequence	HAfT-20_508nt	gi|1046882038|ref|XR_001837201.1|	11	81.03	N/A	gi|74183338|dbj|AK135559.1|	14	81.08	Mus musculus 12 days embryo female mullerian duct includes surrounding region cDNA, RIKEN full-length enriched library, clone:6820449O08 product:unclassifiable, full insert sequence	gi|372099092|ref|NC_000084.6|	88	79.265	Mus musculus strain C57BL/6J chromosome 18, GRCm38.p4 C57BL/6J	0	0	0	0	0	0	0	0
HAfT20	NOVEL lncRNA	Computationally derived sequence	Cufflinks_00027672_737nt	gi|1046882038|ref|XR_001837201.1|	8	81.03	N/A	gi|294345401|ref|NR_033453.1|	20	91.67	Mus musculus RIKEN cDNA 9130209A04 gene (9130209A04Rik), long non-coding RNA	gi|372099092|ref|NC_000084.6|	89	83.0833	Mus musculus strain C57BL/6J chromosome 18, GRCm38.p4 C57BL/6J	0	0	0	0	gi|568815593|ref|NC_000005.10|	19	79.72	Homo sapiens chromosome 5, GRCh38.p7 Primary Assembly
HAfT21	NOVEL lncRNA	Experimentally validated sequence	HAfT-21_VariantX1_139nt	0	0	0	0	0	0	0	0	gi|372099093|ref|NC_000083.6|	72	78.43	Mus musculus strain C57BL/6J chromosome 17, GRCm38.p4 C57BL/6J	0	0	0	0	0	0	0	0
HAfT21	NOVEL lncRNA	Experimentally validated sequence	HAfT-21_VariantX2_223nt	0	0	0	0	0	0	0	0	gi|372099093|ref|NC_000083.6|	79	76.97	Mus musculus strain C57BL/6J chromosome 17, GRCm38.p4 C57BL/6J	0	0	0	0	0	0	0	0
HAfT21	NOVEL lncRNA	Computationally derived sequence	Cufflinks_00034634_2443nt	gi|298888052|emb|FQ233769.1|	3	90.77	Rattus norvegicus TL0AEA60YI04 mRNA sequence	gi|1039752539|ref|XM_017317213.1|	6	74.68	N/A	gi|372099093|ref|NC_000083.6|	98	79.065	Mus musculus strain C57BL/6J chromosome 17, GRCm38.p4 C57BL/6J	gi|34532966|dbj|AK126473.1|	3	86.75	Homo sapiens cDNA FLJ44509 fis, clone UTERU3001585, weakly similar to Cytochrome P450 4c3 (EC 1.14.-.-)	gi|568815592|ref|NC_000006.12|	20	78.4133	Homo sapiens chromosome 6, GRCh38.p7 Primary Assembly
HAfT22	NOVEL lncRNA	Computationally derived sequence	Cufflinks_00078728_4974nt	gi|1046882409|ref|XR_001837278.1|	7	68.3	N/A	gi|74194457|dbj|AK163289.1|	40	81.28	Mus musculus 2 cells egg cDNA, RIKEN full-length enriched library, clone:B020010C21 product:unclassifiable, full insert sequence	gi|372099095|ref|NC_000081.6|	96	87.2967	Mus musculus strain C57BL/6J chromosome 15, GRCm38.p4 C57BL/6J	gi|1034576670|ref|XR_931029.2|	3	71.01	N/A	gi|568815590|ref|NC_000008.11|	35	74.9575	Homo sapiens chromosome 8, GRCh38.p7 Primary Assembly
HAfT22	NOVEL lncRNA	Experimentally validated sequence	HAfT-22_VariantX1_760nt	0	0	0	0	0	0	0	0	gi|372099095|ref|NC_000081.6|	89	86.9625	Mus musculus strain C57BL/6J chromosome 15, GRCm38.p4 C57BL/6J	0	0	0	0	gi|568815590|ref|NC_000008.11|	38	86.655	Homo sapiens chromosome 8, GRCh38.p7 Primary Assembly
HAfT22	NOVEL lncRNA	Computationally derived sequence	Cufflinks_00053773_2795nt	gi|1046882409|ref|XR_001837278.1|	12	68.3	N/A	gi|74194457|dbj|AK163289.1|	6	82.54	Mus musculus 2 cells egg cDNA, RIKEN full-length enriched library, clone:B020010C21 product:unclassifiable, full insert sequence	gi|372099095|ref|NC_000081.6|	99	83.01	Mus musculus strain C57BL/6J chromosome 15, GRCm38.p4 C57BL/6J	0	0	0	0	gi|568815590|ref|NC_000008.11|	38	77.37	Homo sapiens chromosome 8, GRCh38.p7 Primary Assembly
HAfT22	NOVEL lncRNA	Experimentally validated sequence	HAfT-22_VariantX2_563nt	0	0	0	0	0	0	0	0	gi|372099095|ref|NC_000081.6|	94	90.6	Mus musculus strain C57BL/6J chromosome 15, GRCm38.p4 C57BL/6J	0	0	0	0	gi|568815590|ref|NC_000008.11|	45	83.07	Homo sapiens chromosome 8, GRCh38.p7 Primary Assembly
HAfT23	LOC108351462	Known LOC	>LOC108351462_2600nt	gi|1046835177|ref|XR_001844336.1|	100	100	N/A	gi|1039766155|ref|XR_867797.2|	11	74.754	N/A	gi|372099100|ref|NC_000076.6|	80	80.622	Mus musculus strain C57BL/6J chromosome 10, GRCm38.p4 C57BL/6J	gi|1034657050|ref|XM_017012674.1|	2	90.244	N/A	gi|568815586|ref|NC_000012.12|	18	79.8845	Homo sapiens chromosome 12, GRCh38.p7 Primary Assembly
HAfT23	LOC108351462	Computationally derived sequence	Cufflinks_00078399_8748nt	gi|1046897755|ref|XR_001838858.1|	12	100	N/A	gi|1039791626|ref|XR_001778719.1|	4	91.47	N/A	gi|372099100|ref|NC_000076.6|	44	82.868	Mus musculus strain C57BL/6J chromosome 10, GRCm38.p4 C57BL/6J	gi|21758119|dbj|AK098165.1|	1	83.08	Homo sapiens cDNA FLJ40846 fis, clone TRACH2014544	gi|568815586|ref|NC_000012.12|	8	76.5925	Homo sapiens chromosome 12, GRCh38.p7 Primary Assembly
HAfT23	LOC108351462	Computationally derived sequence	Cufflinks_00053916_3238nt	gi|1046897755|ref|XR_001838858.1|	79	100	N/A	gi|1039766155|ref|XR_867797.2|	9	74.75	N/A	gi|372099100|ref|NC_000076.6|	72	79.76	Mus musculus strain C57BL/6J chromosome 10, GRCm38.p4 C57BL/6J	gi|1034657050|ref|XM_017012674.1|	1	90.24	N/A	gi|568815586|ref|NC_000012.12|	14	79.8825	Homo sapiens chromosome 12, GRCh38.p7 Primary Assembly
HAfT23	LOC108351462	Experimentally validated sequence	HAfT-23_VariantX2_1053nt	gi|1046897755|ref|XR_001838858.1|	100	99.81	N/A	gi|1039746862|ref|XM_017316193.1|	4	90.48	N/A	gi|372099100|ref|NC_000076.6|	95	83.095	Mus musculus strain C57BL/6J chromosome 10, GRCm38.p4 C57BL/6J	gi|1034657050|ref|XM_017012674.1|	4	90.24	N/A	gi|568815586|ref|NC_000012.12|	39	79.5	Homo sapiens chromosome 12, GRCh38.p7 Primary Assembly
HAfT23	LOC108351462	Computationally derived sequence	Cufflinks_00053917_915nt	gi|1046897755|ref|XR_001838858.1|	88	100	N/A	gi|187952050|gb|BC138825.1|	10	79.38	Mus musculus forkhead box N2, mRNA (cDNA clone IMAGE:8861847), complete cds	gi|372099100|ref|NC_000076.6|	94	83.0533	Mus musculus strain C57BL/6J chromosome 10, GRCm38.p4 C57BL/6J	gi|1034657050|ref|XM_017012674.1|	4	90.24	N/A	gi|568815586|ref|NC_000012.12|	46	79.5	Homo sapiens chromosome 12, GRCh38.p7 Primary Assembly
HAfT23	LOC108351462	Experimentally validated sequence	HAfT-23_VariantX1_873nt	gi|1046897755|ref|XR_001838858.1|	96	96.9	N/A	gi|1039746862|ref|XM_017316193.1|	5	90.48	N/A	gi|372099100|ref|NC_000076.6|	96	80.585	Mus musculus strain C57BL/6J chromosome 10, GRCm38.p4 C57BL/6J	gi|1034657050|ref|XM_017012674.1|	5	90.24	N/A	gi|568815586|ref|NC_000012.12|	47	79.5	Homo sapiens chromosome 12, GRCh38.p7 Primary Assembly
HAfT24	NOVEL lncRNA	Computationally derived sequence	Cufflinks_00007062_1742nt	gi|25742644|ref|NM_053558.1|	6	83.02	Rattus norvegicus transient receptor potential cation channel, subfamily C, member 1 (Trpc1), mRNA	gi|1039755499|ref|XM_006525546.3|	7	85.09	N/A	gi|372099099|ref|NC_000077.6|	95	87.25	Mus musculus strain C57BL/6J chromosome 11, GRCm38.p4 C57BL/6J	gi|34532984|dbj|AK126488.1|	5	75.56	Homo sapiens cDNA FLJ44524 fis, clone UTERU3003135	gi|568815581|ref|NC_000017.11|	36	85.33	Homo sapiens chromosome 17, GRCh38.p7 Primary Assembly
HAfT24	NOVEL lncRNA	Experimentally validated sequence	HAfT-24_499nt	0	0	0	0	0	0	0	0	gi|372099099|ref|NC_000077.6|	100	90.84	Mus musculus strain C57BL/6J chromosome 11, GRCm38.p4 C57BL/6J	0	0	0	0	gi|568815581|ref|NC_000017.11|	68	95.89	Homo sapiens chromosome 17, GRCh38.p7 Primary Assembly
HAfT25	Pvt1_VariantX2_XR355720.3_3592nt	Experimentally validated sequence	HAfT-25_1501nt	gi|1046898055|ref|XR_593572.2|	62	99.89	N/A	gi|929981618|ref|NR_132746.1|	26	83.08	N/A	gi|372099095|ref|NC_000081.6|	73	82.198	Mus musculus strain C57BL/6J chromosome 15, GRCm38.p4 C57BL/6J	gi|685844126|tpe|LN608275.1|	14	70.39	N/A	gi|568815590|ref|NC_000008.11|	15	73.985	Homo sapiens chromosome 8, GRCh38.p7 Primary Assembly
HAfT25	Pvt1_VariantX2_XR355720.3_3592nt	Known LOC	Pvt1_VariantX2_XR355720.3_3592nt	gi|1046898035|ref|XR_355720.3|	100	100	N/A	gi|929981618|ref|NR_132746.1|	51	81.61	N/A	gi|372099095|ref|NC_000081.6|	94	82.2167	Mus musculus strain C57BL/6J chromosome 15, GRCm38.p4 C57BL/6J	gi|929524279|ref|NR_003367.3|	9	67.72	N/A	gi|568815590|ref|NC_000008.11|	34	72.7067	Homo sapiens chromosome 8, GRCh38.p7 Primary Assembly
HAfT25	Pvt1_VariantX2_XR355720.3_3592nt	Computationally derived sequence	Cufflinks_00054567_2279nt	gi|1046898035|ref|XR_355720.3|	92	100	N/A	gi|929981618|ref|NR_132746.1|	78	81.7	N/A	gi|372099095|ref|NC_000081.6|	87	85.24	Mus musculus strain C57BL/6J chromosome 15, GRCm38.p4 C57BL/6J	0	0	0	0	gi|568815590|ref|NC_000008.11|	36	69.33	Homo sapiens chromosome 8, GRCh38.p7 Primary Assembly
HAfT25	Pvt1_VariantX2_XR355720.3_3592nt	Computationally derived sequence	Cufflinks_00054102_629nt	gi|1046898044|ref|XR_593565.2|	100	100	N/A	gi|929981618|ref|NR_132746.1|	78	84.65	N/A	gi|372099095|ref|NC_000081.6|	62	77.69	Mus musculus strain C57BL/6J chromosome 15, GRCm38.p4 C57BL/6J	gi|685844126|tpe|LN608275.1|	55	69.38	N/A	gi|568815590|ref|NC_000008.11|	51	72.335	Homo sapiens chromosome 8, GRCh38.p7 Primary Assembly
HAfT26	Cyp2c24_NM001271354_1989nt	Known LOC	Cyp2c24_NM001271354_1989nt	gi|405113046|ref|NM_001271354.1|	100	100	Rattus norvegicus cytochrome P450, family 2, subfamily c, polypeptide 24 (Cyp2c24), mRNA	gi|146141169|ref|NM_028089.3|	100	90.68	Mus musculus cytochrome P450, family 2, subfamily c, polypeptide 55 (Cyp2c55), mRNA	gi|372099091|ref|NC_000085.6|	70	91.66	Mus musculus strain C57BL/6J chromosome 19, GRCm38.p4 C57BL/6J	gi|193083146|ref|NM_000772.2|	77	82.69	Homo sapiens cytochrome P450, family 2, subfamily C, polypeptide 18 (CYP2C18), transcript variant 1, mRNA	gi|568815588|ref|NC_000010.11|	28	84.7067	Homo sapiens chromosome 10, GRCh38.p7 Primary Assembly
HAfT26	Cyp2c24_NM001271354_1989nt	Computationally derived sequence	Cufflinks_00006202_425nt	gi|405113046|ref|NM_001271354.1|	99	100	Rattus norvegicus cytochrome P450, family 2, subfamily c, polypeptide 24 (Cyp2c24), mRNA	gi|569007848|ref|XM_006527355.1|	99	93.84	N/A	gi|372099091|ref|NC_000085.6|	63	94.69	Mus musculus strain C57BL/6J chromosome 19, GRCm38.p4 C57BL/6J	gi|193083146|ref|NM_000772.2|	99	83.18	Homo sapiens cytochrome P450, family 2, subfamily C, polypeptide 18 (CYP2C18), transcript variant 1, mRNA	gi|568815588|ref|NC_000010.11|	96	85.4433	Homo sapiens chromosome 10, GRCh38.p7 Primary Assembly
HAfT27	Rps27l_NM001276477_698nt	Computationally derived sequence	Cufflinks_00056890_307nt	gi|451770393|ref|NM_001276477.1|	100	99.67	Rattus norvegicus ribosomal protein S27-like (Rps27l), mRNA	gi|1039794006|ref|XM_017313541.1|	42	89.23	N/A	gi|372099101|ref|NC_000075.6|	79	81.1	Mus musculus strain C57BL/6J chromosome 9, GRCm38.p4 C57BL/6J	0	0	0	0	gi|568815583|ref|NC_000015.10|	28	72.41	Homo sapiens chromosome 15, GRCh38.p7 Primary Assembly
HAfT27	Rps27l_NM001276477_698nt	Computationally derived sequence	Cufflinks_00055299_577nt	gi|451770393|ref|NM_001276477.1|	53	100	Rattus norvegicus ribosomal protein S27-like (Rps27l), mRNA	gi|902967391|ref|NM_026467.4|	53	94.77	N/A	gi|372099107|ref|NC_000069.6|	52	92.81	Mus musculus strain C57BL/6J chromosome 3, GRCm38.p4 C57BL/6J	gi|10436903|dbj|AK024591.1|	51	83.87	Homo sapiens cDNA: FLJ20938 fis, clone ADSE01577	gi|568815582|ref|NC_000016.10|	51	82.85	Homo sapiens chromosome 16, GRCh38.p7 Primary Assembly
HAfT27	Rps27l_NM001276477_698nt	Known LOC	Rps27l_NM001276477_698nt	gi|451770393|ref|NM_001276477.1|	100	100	Rattus norvegicus ribosomal protein S27-like (Rps27l), mRNA	gi|902967391|ref|NM_026467.4|	74	94.02	N/A	gi|372099090|ref|NC_000086.7|	69	91.75	Mus musculus strain C57BL/6J chromosome X, GRCm38.p4 C57BL/6J	gi|4454711|gb|AF070668.1|	64	83.7	Homo sapiens 40S ribosomal protein S27 isoform mRNA, complete cds	gi|568815582|ref|NC_000016.10|	59	83.41	Homo sapiens chromosome 16, GRCh38.p7 Primary Assembly
HAfT4_598nt	HAfT4_598nt		>HAfT4_598nt	gi|672026258|ref|XR_339294.2|	99	98.173	N/A	gi|74182038|dbj|AK157406.1|	27	85.455	Mus musculus activated spleen cDNA, RIKEN full-length enriched library, clone:F830213N11 product:unclassifiable, full insert sequence	gi|372099094|ref|NC_000082.6|	96	88.0135	Mus musculus strain C57BL/6J chromosome 16, GRCm38.p4 C57BL/6J	0	0	0	0	gi|568815595|ref|NC_000003.12|	57	72.434	Homo sapiens chromosome 3, GRCh38.p7 Primary Assembly
HAfT5_410nt	HAfT5_410nt		>HAfT5_410nt	0	0	0	0	0	0	0	0	gi|372099102|ref|NC_000074.6|	99	79.905	Mus musculus strain C57BL/6J chromosome 8, GRCm38.p4 C57BL/6J	0	0	0	0	gi|568815590|ref|NC_000008.11|	52	70	Homo sapiens chromosome 8, GRCh38.p7 Primary Assembly
Cufflinks_00025137_8415nt	Cufflinks_00025137_8415nt		>Cufflinks_00025137_8415nt	gi|1046866860|ref|XR_596705.2|	51	100	N/A	gi|755544920|ref|XR_382269.2|	6	82.231	N/A	gi|372099097|ref|NC_000079.6|	93	81.3667	Mus musculus strain C57BL/6J chromosome 13, GRCm38.p4 C57BL/6J	gi|34535367|dbj|AK128141.1|	1	75.556	Homo sapiens cDNA FLJ46262 fis, clone TESTI4025401	gi|568815592|ref|NC_000006.12|	38	71.1065	Homo sapiens chromosome 6, GRCh38.p7 Primary Assembly
LOC108349448_VariantX1_283nt	LOC108349448_VariantX1_283nt		>LOC108349448_VariantX1_283nt	gi|1046846365|ref|XR_001835907.1|	100	100	N/A	gi|1039780978|ref|XR_001778223.1|	58	89.024	N/A	gi|372099103|ref|NC_000073.6|	80	84.367	Mus musculus strain C57BL/6J chromosome 7, GRCm38.p4 C57BL/6J	0	0	0	0	0	0	0	0
LOC108349448_VariantX2_619nt	LOC108349448_VariantX2_619nt		>LOC108349448_VariantX2_619nt	gi|1046818058|ref|XR_001835418.1|	100	100	N/A	gi|1039780978|ref|XR_001778223.1|	26	89.024	N/A	gi|372099103|ref|NC_000073.6|	95	83.0177	Mus musculus strain C57BL/6J chromosome 7, GRCm38.p4 C57BL/6J	0	0	0	0	0	0	0	0
LOC108351462_2600nt	LOC108351462_2600nt		>LOC108351462_2600nt	gi|1046835177|ref|XR_001844336.1|	100	100	N/A	gi|1039766155|ref|XR_867797.2|	11	74.754	N/A	gi|372099100|ref|NC_000076.6|	80	80.622	Mus musculus strain C57BL/6J chromosome 10, GRCm38.p4 C57BL/6J	gi|1034657050|ref|XM_017012674.1|	2	90.244	N/A	gi|568815586|ref|NC_000012.12|	18	79.8845	Homo sapiens chromosome 12, GRCh38.p7 Primary Assembly

## Sheet: MoHomolChrRegions
Representative HAFT#	Refseq/Ensembl	Type_of_sequence	sequence_id	Rat RNA subject ID (from blastn)	Rat RNA coverage (from blastn)	Rat RNA %identity (from blastn)	Rat RNA subject title (from blastn)	Mouse RNA subject ID (from blastn)	Mouse RNA coverage (from blastn)	Mouse RNA %identity (from blastn)	Mouse RNA subject title (from blastn)	Mouse chromosome subject ID (from blastn)	Mouse chromosome coverage (from blastn)	Mouse chromosome %identity (from blastn)	Mouse chromosome subject title (from blastn)	Human RNA subject ID (from blastn)	Human RNA coverage (from blastn)	Human RNA %identity (from blastn)	Human RNA subject title (from blastn)	Human chromosome subject ID (from blastn)	Human chromosome coverage (from blastn)	Human chromosome %identity (from blastn)	Human chromosome subject title (from blastn)
HAfT4	LOC102549932_877nt_VariantX1	Known LOC	LOC102549932_877nt_VariantX1	gi|672071586|ref|XR_358411.2|	100	100	N/A	gi|26090794|dbj|AK045243.1|	22	86.22	Mus musculus 9.5 days embryo parthenogenote cDNA, RIKEN full-length enriched library, clone:B130050K13 product:unclassifiable, full insert sequence	gi|372099094|ref|NC_000082.6|	100	84.84	Mus musculus strain C57BL/6J chromosome 16, GRCm38.p4 C57BL/6J	0	0	0	0	gi|568815595|ref|NC_000003.12|	35	72.84	Homo sapiens chromosome 3, GRCh38.p7 Primary Assembly
HAfT5	LOC103693988_2269nt	Known LOC	LOC103693988_2269nt	0	0	0	0	0	0	0	0	gi|372099102|ref|NC_000074.6|	100	80.5067	Mus musculus strain C57BL/6J chromosome 8, GRCm38.p4 C57BL/6J	0	0	0	0	gi|568815590|ref|NC_000008.11|	48	67.76	Homo sapiens chromosome 8, GRCh38.p7 Primary Assembly
HAfT7	LOC102555869_VariantX1_1695nt	Computationally derived sequence	Cufflinks_00037591_4007nt	gi|1046866581|ref|XR_360823.3|	36	100	N/A	gi|1039742751|ref|XR_001780661.1|	4	76.57	N/A	gi|372099097|ref|NC_000079.6|	100	82.232	Mus musculus strain C57BL/6J chromosome 13, GRCm38.p4 C57BL/6J	gi|1034680887|ref|XR_959929.2|	3	74.05	N/A	gi|568815585|ref|NC_000013.11|	3	76.43	Homo sapiens chromosome 13, GRCh38.p7 Primary Assembly
HAfT8	LOC102554927_1083nt	Computationally derived sequence	Cufflinks_00026037_1707nt	gi|672029892|ref|XM_008773945.1|	8	100	N/A	gi|1039744657|ref|XR_873323.2|	57	82.96	N/A	gi|372099097|ref|NC_000079.6|	100	82.745	Mus musculus strain C57BL/6J chromosome 13, GRCm38.p4 C57BL/6J	gi|7021091|dbj|AK000789.1|	9	75.66	Homo sapiens cDNA FLJ20782 fis, clone COL03841	gi|568815584|ref|NC_000014.9|	19	69.21	Homo sapiens chromosome 14, GRCh38.p7 Primary Assembly
HAfT24	NOVEL lncRNA	Experimentally validated sequence	HAfT-24_499nt	0	0	0	0	0	0	0	0	gi|372099099|ref|NC_000077.6|	100	90.84	Mus musculus strain C57BL/6J chromosome 11, GRCm38.p4 C57BL/6J	0	0	0	0	gi|568815581|ref|NC_000017.11|	68	95.89	Homo sapiens chromosome 17, GRCh38.p7 Primary Assembly
HAfT22	NOVEL lncRNA	Computationally derived sequence	Cufflinks_00053773_2795nt	gi|1046882409|ref|XR_001837278.1|	12	68.3	N/A	gi|74194457|dbj|AK163289.1|	6	82.54	Mus musculus 2 cells egg cDNA, RIKEN full-length enriched library, clone:B020010C21 product:unclassifiable, full insert sequence	gi|372099095|ref|NC_000081.6|	99	83.01	Mus musculus strain C57BL/6J chromosome 15, GRCm38.p4 C57BL/6J	0	0	0	0	gi|568815590|ref|NC_000008.11|	38	77.37	Homo sapiens chromosome 8, GRCh38.p7 Primary Assembly
HAfT6	LOC102552829_484nt_VariantX1	Known LOC	LOC102552829_484nt_VariantX1	gi|1046864915|ref|XR_596518.2|	100	100	N/A	0	0	0	0	gi|372099102|ref|NC_000074.6|	98	86.37	Mus musculus strain C57BL/6J chromosome 8, GRCm38.p4 C57BL/6J	gi|1034697042|ref|XR_956783.2|	12	79.69	N/A	gi|568815590|ref|NC_000008.11|	80	71.345	Homo sapiens chromosome 8, GRCh38.p7 Primary Assembly
HAfT21	NOVEL lncRNA	Computationally derived sequence	Cufflinks_00034634_2443nt	gi|298888052|emb|FQ233769.1|	3	90.77	Rattus norvegicus TL0AEA60YI04 mRNA sequence	gi|1039752539|ref|XM_017317213.1|	6	74.68	N/A	gi|372099093|ref|NC_000083.6|	98	79.065	Mus musculus strain C57BL/6J chromosome 17, GRCm38.p4 C57BL/6J	gi|34532966|dbj|AK126473.1|	3	86.75	Homo sapiens cDNA FLJ44509 fis, clone UTERU3001585, weakly similar to Cytochrome P450 4c3 (EC 1.14.-.-)	gi|568815592|ref|NC_000006.12|	20	78.4133	Homo sapiens chromosome 6, GRCh38.p7 Primary Assembly
HAfT9	LOC103694221_5009nt	Known LOC	LOC103694221_5009nt	gi|1046869013|ref|XR_597004.2|	73	99.95	N/A	gi|328447192|ref|NR_038088.1|	2	96	Mus musculus brain cytoplasmic RNA 1 (Bc1), long non-coding RNA	gi|372099092|ref|NC_000084.6|	97	84.205	Mus musculus strain C57BL/6J chromosome 18, GRCm38.p4 C57BL/6J	gi|21758119|dbj|AK098165.1|	2	86.18	Homo sapiens cDNA FLJ40846 fis, clone TRACH2014544	gi|568815593|ref|NC_000005.10|	53	79.7225	Homo sapiens chromosome 5, GRCh38.p7 Primary Assembly
HAfT23	LOC108351462	Experimentally validated sequence	HAfT-23_VariantX1_873nt	gi|1046897755|ref|XR_001838858.1|	96	96.9	N/A	gi|1039746862|ref|XM_017316193.1|	5	90.48	N/A	gi|372099100|ref|NC_000076.6|	96	80.585	Mus musculus strain C57BL/6J chromosome 10, GRCm38.p4 C57BL/6J	gi|1034657050|ref|XM_017012674.1|	5	90.24	N/A	gi|568815586|ref|NC_000012.12|	47	79.5	Homo sapiens chromosome 12, GRCh38.p7 Primary Assembly
HAfT15	LOC102552388_VariantX1_968nt	Computationally derived sequence	Cufflinks_00048965_3008nt	gi|1046894370|ref|XR_355172.3|	33	100	N/A	gi|35193123|gb|BC058624.1|	4	90.4	Mus musculus coiled-coil domain containing 36, mRNA (cDNA clone IMAGE:5716219), partial cds	gi|372099098|ref|NC_000078.6|	95	80.5025	Mus musculus strain C57BL/6J chromosome 12, GRCm38.p4 C57BL/6J	gi|21758119|dbj|AK098165.1|	4	85.09	Homo sapiens cDNA FLJ40846 fis, clone TRACH2014544	gi|568815584|ref|NC_000014.9|	13	82.23	Homo sapiens chromosome 14, GRCh38.p7 Primary Assembly
HAfT17	LOC108349448_VariantX2	Known LOC	>LOC108349448_VariantX2_619nt	gi|1046818058|ref|XR_001835418.1|	100	100	N/A	gi|1039780978|ref|XR_001778223.1|	26	89.024	N/A	gi|372099103|ref|NC_000073.6|	95	83.0177	Mus musculus strain C57BL/6J chromosome 7, GRCm38.p4 C57BL/6J	0	0	0	0	0	0	0	0
HAfT25	Pvt1_VariantX2_XR355720.3_3592nt	Known LOC	Pvt1_VariantX2_XR355720.3_3592nt	gi|1046898035|ref|XR_355720.3|	100	100	N/A	gi|929981618|ref|NR_132746.1|	51	81.61	N/A	gi|372099095|ref|NC_000081.6|	94	82.2167	Mus musculus strain C57BL/6J chromosome 15, GRCm38.p4 C57BL/6J	gi|929524279|ref|NR_003367.3|	9	67.72	N/A	gi|568815590|ref|NC_000008.11|	34	72.7067	Homo sapiens chromosome 8, GRCh38.p7 Primary Assembly
HAfT1	LOC103691380_1354nt	Known LOC	LOC103691380_1354nt	gi|1046847434|ref|XR_590740.2|	100	100	N/A	gi|74193422|dbj|AK047239.1|	8	82.52	Mus musculus 10 days neonate cerebellum cDNA, RIKEN full-length enriched library, clone:B930041E19 product:unclassifiable, full insert sequence	gi|372099091|ref|NC_000085.6|	93	80.695	Mus musculus strain C57BL/6J chromosome 19, GRCm38.p4 C57BL/6J	gi|34532155|dbj|AK125891.1|	3	94.12	Homo sapiens cDNA FLJ43903 fis, clone TESTI4010211	gi|568815588|ref|NC_000010.11|	18	86.565	Homo sapiens chromosome 10, GRCh38.p7 Primary Assembly
HAfT12	LOC102555623_VariantX2_4882nt	Known LOC	LOC102555623_VariantX2_4882nt	gi|672044391|ref|XR_352069.2|	100	100	N/A	gi|326381138|ref|NR_037975.1|	3	89.6	Mus musculus predicted gene 5105 (Gm5105), long non-coding RNA	gi|372099107|ref|NC_000069.6|	93	76.87	Mus musculus strain C57BL/6J chromosome 3, GRCm38.p4 C57BL/6J	0	0	0	0	gi|568815594|ref|NC_000004.12|	16	72.3333	Homo sapiens chromosome 4, GRCh38.p7 Primary Assembly
HAfT3	LOC103690347_973nt	Known LOC	LOC103690347_973nt	gi|1046846723|ref|XR_590517.2|	100	100	N/A	0	0	0	0	gi|372099103|ref|NC_000073.6|	91	92.105	Mus musculus strain C57BL/6J chromosome 7, GRCm38.p4 C57BL/6J	0	0	0	0	gi|568815588|ref|NC_000010.11|	81	81.395	Homo sapiens chromosome 10, GRCh38.p7 Primary Assembly
HAfT18	NOVEL lncRNA	Computationally derived sequence	Cufflinks_00036996_5428nt	gi|298904906|emb|FQ231867.1|	4	80.56	Rattus norvegicus TL0AEA67YO03 mRNA sequence	gi|74149250|dbj|AK135073.1|	4	84.96	Mus musculus adult male olfactory brain cDNA, RIKEN full-length enriched library, clone:6430570L05 product:hypothetical Phosphoenolpyruvate carboxykinase, N-terminal containing protein, full insert sequence	gi|372099108|ref|NC_000068.7|	91	77.93	Mus musculus strain C57BL/6J chromosome 2, GRCm38.p4 C57BL/6J	gi|1034671477|ref|XR_001746388.1|	2	77.65	N/A	gi|568815588|ref|NC_000010.11|	12	74.35	Homo sapiens chromosome 10, GRCh38.p7 Primary Assembly
HAfT20	NOVEL lncRNA	Computationally derived sequence	Cufflinks_00027672_737nt	gi|1046882038|ref|XR_001837201.1|	8	81.03	N/A	gi|294345401|ref|NR_033453.1|	20	91.67	Mus musculus RIKEN cDNA 9130209A04 gene (9130209A04Rik), long non-coding RNA	gi|372099092|ref|NC_000084.6|	89	83.0833	Mus musculus strain C57BL/6J chromosome 18, GRCm38.p4 C57BL/6J	0	0	0	0	gi|568815593|ref|NC_000005.10|	19	79.72	Homo sapiens chromosome 5, GRCh38.p7 Primary Assembly
HAfT14	LOC100910558_Variant1_1713nt	Known LOC	LOC100910558_Variant1_1713nt	gi|586804697|ref|NR_110678.1|	100	100	N/A	gi|1042998947|ref|NR_137202.1|	62	78.2	N/A	gi|372099106|ref|NC_000070.6|	88	84.4767	Mus musculus strain C57BL/6J chromosome 4, GRCm38.p4 C57BL/6J	gi|551866518|tpe|HG501902.1|	15	84.41	TPA: Homo sapiens RP11-120J1.1 gene for long non-coding RNA OTTHUMT00000051744.1, antisense	gi|568815589|ref|NC_000009.12|	29	78.54	Homo sapiens chromosome 9, GRCh38.p7 Primary Assembly
HAfT16	LOC102553833_5941nt	Known LOC	LOC102553833_5941nt	gi|1046901562|ref|XR_356107.3|	99	100	N/A	0	0	0	0	gi|372099101|ref|NC_000075.6|	85	87.895	Mus musculus strain C57BL/6J chromosome 9, GRCm38.p4 C57BL/6J	0	0	0	0	gi|568815587|ref|NC_000011.10|	48	71.8775	Homo sapiens chromosome 11, GRCh38.p7 Primary Assembly
HAfT11	LOC102547196_1425nt	Known LOC	LOC102547196_1425nt	gi|672031444|ref|XR_342420.2|	100	100	N/A	gi|1039791382|ref|XR_879017.2|	11	82.12	N/A	gi|372099102|ref|NC_000074.6|	84	78.64	Mus musculus strain C57BL/6J chromosome 8, GRCm38.p4 C57BL/6J	gi|31874823|emb|BX538330.1|	3	90.24	Homo sapiens mRNA; cDNA DKFZp686I14200 (from clone DKFZp686I14200)	0	0	0	0
HAfT27	Rps27l_NM001276477_698nt	Computationally derived sequence	Cufflinks_00056890_307nt	gi|451770393|ref|NM_001276477.1|	100	99.67	Rattus norvegicus ribosomal protein S27-like (Rps27l), mRNA	gi|1039794006|ref|XM_017313541.1|	42	89.23	N/A	gi|372099101|ref|NC_000075.6|	79	81.1	Mus musculus strain C57BL/6J chromosome 9, GRCm38.p4 C57BL/6J	0	0	0	0	gi|568815583|ref|NC_000015.10|	28	72.41	Homo sapiens chromosome 15, GRCh38.p7 Primary Assembly
HAfT13	LOC102548205_2545nt	Computationally derived sequence	Cufflinks_00035253_1571nt	gi|1046877381|ref|XR_362127.3|	100	100	N/A	gi|74209646|dbj|AK138174.1|	17	73.26	Mus musculus adult male hypothalamus cDNA, RIKEN full-length enriched library, clone:A230024L23 product:unclassifiable, full insert sequence	gi|372099100|ref|NC_000076.6|	70	73.4767	Mus musculus strain C57BL/6J chromosome 10, GRCm38.p4 C57BL/6J	gi|551887795|tpe|HG510127.1|	5	85.33	TPA: Homo sapiens RP11-510D19.1 gene for long non-coding RNA OTTHUMT00000431624.1, lincRNA	gi|568815597|ref|NC_000001.11|	5	88.24	Homo sapiens chromosome 1, GRCh38.p7 Primary Assembly
HAfT26	Cyp2c24_NM001271354_1989nt	Known LOC	Cyp2c24_NM001271354_1989nt	gi|405113046|ref|NM_001271354.1|	100	100	Rattus norvegicus cytochrome P450, family 2, subfamily c, polypeptide 24 (Cyp2c24), mRNA	gi|146141169|ref|NM_028089.3|	100	90.68	Mus musculus cytochrome P450, family 2, subfamily c, polypeptide 55 (Cyp2c55), mRNA	gi|372099091|ref|NC_000085.6|	70	91.66	Mus musculus strain C57BL/6J chromosome 19, GRCm38.p4 C57BL/6J	gi|193083146|ref|NM_000772.2|	77	82.69	Homo sapiens cytochrome P450, family 2, subfamily C, polypeptide 18 (CYP2C18), transcript variant 1, mRNA	gi|568815588|ref|NC_000010.11|	28	84.7067	Homo sapiens chromosome 10, GRCh38.p7 Primary Assembly
HAfT19	NOVEL lncRNA	Experimentally validated sequence	HAfT-19_VariantX2_447nt	gi|672083331|ref|XM_006254746.2|	32	92.25	N/A	gi|755530671|ref|XR_870792.1|	31	73.65	N/A	gi|372099097|ref|NC_000079.6|	62	82.1	Mus musculus strain C57BL/6J chromosome 13, GRCm38.p4 C57BL/6J	0	0	0	0	0	0	0	0
HAfT2	LOC102549099_506nt	Known LOC	LOC102549099_506nt	gi|672028733|ref|XR_340756.2|	100	100	N/A	gi|26094095|dbj|AK050757.1|	11	93.1	Mus musculus 9 days embryo whole body cDNA, RIKEN full-length enriched library, clone:D030017D16 product:unclassifiable, full insert sequence	gi|372099096|ref|NC_000080.6|	61	86.7667	Mus musculus strain C57BL/6J chromosome 14, GRCm38.p4 C57BL/6J	gi|21758119|dbj|AK098165.1|	7	100	Homo sapiens cDNA FLJ40846 fis, clone TRACH2014544	0	0	0	0
HAfT10	LOC102554057_VariantX6_3666nt	Known LOC	LOC102554057_VariantX6_3666nt	gi|1046874326|ref|XR_351399.3|	100	100	N/A	gi|1039744317|ref|XM_011244427.2|	2	82.19	N/A	gi|372099097|ref|NC_000079.6|	45	79.2067	Mus musculus strain C57BL/6J chromosome 13, GRCm38.p4 C57BL/6J	0	0	0	0	gi|568815593|ref|NC_000005.10|	32	73.902	Homo sapiens chromosome 5, GRCh38.p7 Primary Assembly

## Sheet: HuHomolChrRegions
Representative HAFT#	Refseq/Ensembl	Type_of_sequence	sequence_id	Rat RNA subject ID (from blastn)	Rat RNA coverage (from blastn)	Rat RNA %identity (from blastn)	Rat RNA subject title (from blastn)	Mouse RNA subject ID (from blastn)	Mouse RNA coverage (from blastn)	Mouse RNA %identity (from blastn)	Mouse RNA subject title (from blastn)	Mouse chromosome subject ID (from blastn)	Mouse chromosome coverage (from blastn)	Mouse chromosome %identity (from blastn)	Mouse chromosome subject title (from blastn)	Human RNA subject ID (from blastn)	Human RNA coverage (from blastn)	Human RNA %identity (from blastn)	Human RNA subject title (from blastn)	Human chromosome subject ID (from blastn)	Human chromosome coverage (from blastn)	Human chromosome %identity (from blastn)	Human chromosome subject title (from blastn)
HAfT26	Cyp2c24_NM001271354_1989nt	Computationally derived sequence	Cufflinks_00006202_425nt	gi|405113046|ref|NM_001271354.1|	99	100	Rattus norvegicus cytochrome P450, family 2, subfamily c, polypeptide 24 (Cyp2c24), mRNA	gi|569007848|ref|XM_006527355.1|	99	93.84	N/A	gi|372099091|ref|NC_000085.6|	63	94.69	Mus musculus strain C57BL/6J chromosome 19, GRCm38.p4 C57BL/6J	gi|193083146|ref|NM_000772.2|	99	83.18	Homo sapiens cytochrome P450, family 2, subfamily C, polypeptide 18 (CYP2C18), transcript variant 1, mRNA	gi|568815588|ref|NC_000010.11|	96	85.4433	Homo sapiens chromosome 10, GRCh38.p7 Primary Assembly
HAfT10	LOC102554057_VariantX6_3666nt	Computationally derived sequence	Cufflinks_00032581_482nt	gi|1046874328|ref|XR_001836586.1|	93	100	N/A	0	0	0	0	0	0	0	0	0	0	0	0	gi|568815593|ref|NC_000005.10|	87	68.23	Homo sapiens chromosome 5, GRCh38.p7 Primary Assembly
HAfT3	LOC103690347_973nt	Computationally derived sequence	Cufflinks_00005778_832nt	gi|1046846723|ref|XR_590517.2|	100	100	N/A	0	0	0	0	gi|372099103|ref|NC_000073.6|	90	92.36	Mus musculus strain C57BL/6J chromosome 7, GRCm38.p4 C57BL/6J	0	0	0	0	gi|568815588|ref|NC_000010.11|	83	81.885	Homo sapiens chromosome 10, GRCh38.p7 Primary Assembly
HAfT6	LOC102552829_484nt_VariantX1	Known LOC	LOC102552829_484nt_VariantX1	gi|1046864915|ref|XR_596518.2|	100	100	N/A	0	0	0	0	gi|372099102|ref|NC_000074.6|	98	86.37	Mus musculus strain C57BL/6J chromosome 8, GRCm38.p4 C57BL/6J	gi|1034697042|ref|XR_956783.2|	12	79.69	N/A	gi|568815590|ref|NC_000008.11|	80	71.345	Homo sapiens chromosome 8, GRCh38.p7 Primary Assembly
HAfT8	LOC102554927_1083nt	Known LOC	LOC102554927_1083nt	gi|1046866861|ref|XR_596706.2|	100	100	N/A	0	0	0	0	gi|372099097|ref|NC_000079.6|	86	86.5	Mus musculus strain C57BL/6J chromosome 13, GRCm38.p4 C57BL/6J	gi|1034681598|ref|XR_001731885.1|	2	100	N/A	gi|568815592|ref|NC_000006.12|	78	74.2	Homo sapiens chromosome 6, GRCh38.p7 Primary Assembly
HAfT24	NOVEL lncRNA	Experimentally validated sequence	HAfT-24_499nt	0	0	0	0	0	0	0	0	gi|372099099|ref|NC_000077.6|	100	90.84	Mus musculus strain C57BL/6J chromosome 11, GRCm38.p4 C57BL/6J	0	0	0	0	gi|568815581|ref|NC_000017.11|	68	95.89	Homo sapiens chromosome 17, GRCh38.p7 Primary Assembly
HAfT27	Rps27l_NM001276477_698nt	Known LOC	Rps27l_NM001276477_698nt	gi|451770393|ref|NM_001276477.1|	100	100	Rattus norvegicus ribosomal protein S27-like (Rps27l), mRNA	gi|902967391|ref|NM_026467.4|	74	94.02	N/A	gi|372099090|ref|NC_000086.7|	69	91.75	Mus musculus strain C57BL/6J chromosome X, GRCm38.p4 C57BL/6J	gi|4454711|gb|AF070668.1|	64	83.7	Homo sapiens 40S ribosomal protein S27 isoform mRNA, complete cds	gi|568815582|ref|NC_000016.10|	59	83.41	Homo sapiens chromosome 16, GRCh38.p7 Primary Assembly
HAfT4	LOC102549932_877nt_VariantX1	Experimentally validated sequence	>HAfT4_598nt	gi|672026258|ref|XR_339294.2|	99	98.173	N/A	gi|74182038|dbj|AK157406.1|	27	85.455	Mus musculus activated spleen cDNA, RIKEN full-length enriched library, clone:F830213N11 product:unclassifiable, full insert sequence	gi|372099094|ref|NC_000082.6|	96	88.0135	Mus musculus strain C57BL/6J chromosome 16, GRCm38.p4 C57BL/6J	0	0	0	0	gi|568815595|ref|NC_000003.12|	57	72.434	Homo sapiens chromosome 3, GRCh38.p7 Primary Assembly
HAfT5	LOC103693988_2269nt	Computationally derived sequence	Cufflinks_00024199_2117nt	0	0	0	0	0	0	0	0	gi|372099102|ref|NC_000074.6|	98	80.05	Mus musculus strain C57BL/6J chromosome 8, GRCm38.p4 C57BL/6J	0	0	0	0	gi|568815590|ref|NC_000008.11|	53	67.76	Homo sapiens chromosome 8, GRCh38.p7 Primary Assembly
HAfT9	LOC103694221_5009nt	Known LOC	LOC103694221_5009nt	gi|1046869013|ref|XR_597004.2|	73	99.95	N/A	gi|328447192|ref|NR_038088.1|	2	96	Mus musculus brain cytoplasmic RNA 1 (Bc1), long non-coding RNA	gi|372099092|ref|NC_000084.6|	97	84.205	Mus musculus strain C57BL/6J chromosome 18, GRCm38.p4 C57BL/6J	gi|21758119|dbj|AK098165.1|	2	86.18	Homo sapiens cDNA FLJ40846 fis, clone TRACH2014544	gi|568815593|ref|NC_000005.10|	53	79.7225	Homo sapiens chromosome 5, GRCh38.p7 Primary Assembly
HAfT25	Pvt1_VariantX2_XR355720.3_3592nt	Computationally derived sequence	Cufflinks_00054102_629nt	gi|1046898044|ref|XR_593565.2|	100	100	N/A	gi|929981618|ref|NR_132746.1|	78	84.65	N/A	gi|372099095|ref|NC_000081.6|	62	77.69	Mus musculus strain C57BL/6J chromosome 15, GRCm38.p4 C57BL/6J	gi|685844126|tpe|LN608275.1|	55	69.38	N/A	gi|568815590|ref|NC_000008.11|	51	72.335	Homo sapiens chromosome 8, GRCh38.p7 Primary Assembly
HAfT16	LOC102553833_5941nt	Known LOC	LOC102553833_5941nt	gi|1046901562|ref|XR_356107.3|	99	100	N/A	0	0	0	0	gi|372099101|ref|NC_000075.6|	85	87.895	Mus musculus strain C57BL/6J chromosome 9, GRCm38.p4 C57BL/6J	0	0	0	0	gi|568815587|ref|NC_000011.10|	48	71.8775	Homo sapiens chromosome 11, GRCh38.p7 Primary Assembly
HAfT23	LOC108351462	Experimentally validated sequence	HAfT-23_VariantX1_873nt	gi|1046897755|ref|XR_001838858.1|	96	96.9	N/A	gi|1039746862|ref|XM_017316193.1|	5	90.48	N/A	gi|372099100|ref|NC_000076.6|	96	80.585	Mus musculus strain C57BL/6J chromosome 10, GRCm38.p4 C57BL/6J	gi|1034657050|ref|XM_017012674.1|	5	90.24	N/A	gi|568815586|ref|NC_000012.12|	47	79.5	Homo sapiens chromosome 12, GRCh38.p7 Primary Assembly
HAfT22	NOVEL lncRNA	Experimentally validated sequence	HAfT-22_VariantX2_563nt	0	0	0	0	0	0	0	0	gi|372099095|ref|NC_000081.6|	94	90.6	Mus musculus strain C57BL/6J chromosome 15, GRCm38.p4 C57BL/6J	0	0	0	0	gi|568815590|ref|NC_000008.11|	45	83.07	Homo sapiens chromosome 8, GRCh38.p7 Primary Assembly
HAfT13	LOC102548205_2545nt	Known LOC	LOC102548205_2545nt	gi|1046877381|ref|XR_362127.3|	99	100	N/A	gi|74209646|dbj|AK138174.1|	11	73.26	Mus musculus adult male hypothalamus cDNA, RIKEN full-length enriched library, clone:A230024L23 product:unclassifiable, full insert sequence	gi|372099100|ref|NC_000076.6|	61	77.53	Mus musculus strain C57BL/6J chromosome 10, GRCm38.p4 C57BL/6J	gi|551887795|tpe|HG510127.1|	3	85.33	TPA: Homo sapiens RP11-510D19.1 gene for long non-coding RNA OTTHUMT00000431624.1, lincRNA	gi|568815588|ref|NC_000010.11|	37	79.9467	Homo sapiens chromosome 10, GRCh38.p7 Primary Assembly
HAfT14	LOC100910558_Variant1_1713nt	Computationally derived sequence	Cufflinks_00047409_1350nt	gi|586804555|ref|NR_110680.1|	100	100	N/A	gi|1042998947|ref|NR_137202.1|	96	81.44	N/A	gi|372099106|ref|NC_000070.6|	78	78.26	Mus musculus strain C57BL/6J chromosome 4, GRCm38.p4 C57BL/6J	gi|551866518|tpe|HG501902.1|	22	82.08	TPA: Homo sapiens RP11-120J1.1 gene for long non-coding RNA OTTHUMT00000051744.1, antisense	gi|568815589|ref|NC_000009.12|	35	78.57	Homo sapiens chromosome 9, GRCh38.p7 Primary Assembly
HAfT7	LOC102555869_VariantX2_1617nt	Experimentally validated sequence	HAfT-7_VariantX2_656nt	gi|1046866581|ref|XR_360823.3|	67	100	N/A	gi|1039742751|ref|XR_001780661.1|	26	76.74	N/A	gi|372099097|ref|NC_000079.6|	96	83.9467	Mus musculus strain C57BL/6J chromosome 13, GRCm38.p4 C57BL/6J	0	0	0	0	gi|568815589|ref|NC_000009.12|	33	69.3	Homo sapiens chromosome 9, GRCh38.p7 Primary Assembly
HAfT19	NOVEL lncRNA	Computationally derived sequence	Cufflinks_00026127_939nt	gi|672083331|ref|XM_006254746.2|	14	93.13	N/A	gi|755530671|ref|XR_870792.1|	15	73.65	N/A	gi|372099097|ref|NC_000079.6|	46	82.085	Mus musculus strain C57BL/6J chromosome 13, GRCm38.p4 C57BL/6J	0	0	0	0	gi|568815591|ref|NC_000007.14|	28	75.75	Homo sapiens chromosome 7, GRCh38.p7 Primary Assembly
HAfT12	LOC102555623	Computationally derived sequence	Cufflinks_00033179_2265nt	gi|1046875806|ref|XR_591366.2|	100	100	N/A	0	0	0	0	gi|372099107|ref|NC_000069.6|	88	77.47	Mus musculus strain C57BL/6J chromosome 3, GRCm38.p4 C57BL/6J	0	0	0	0	gi|568815594|ref|NC_000004.12|	22	72.64	Homo sapiens chromosome 4, GRCh38.p7 Primary Assembly
HAfT21	NOVEL lncRNA	Computationally derived sequence	Cufflinks_00034634_2443nt	gi|298888052|emb|FQ233769.1|	3	90.77	Rattus norvegicus TL0AEA60YI04 mRNA sequence	gi|1039752539|ref|XM_017317213.1|	6	74.68	N/A	gi|372099093|ref|NC_000083.6|	98	79.065	Mus musculus strain C57BL/6J chromosome 17, GRCm38.p4 C57BL/6J	gi|34532966|dbj|AK126473.1|	3	86.75	Homo sapiens cDNA FLJ44509 fis, clone UTERU3001585, weakly similar to Cytochrome P450 4c3 (EC 1.14.-.-)	gi|568815592|ref|NC_000006.12|	20	78.4133	Homo sapiens chromosome 6, GRCh38.p7 Primary Assembly
HAfT20	NOVEL lncRNA	Computationally derived sequence	Cufflinks_00027672_737nt	gi|1046882038|ref|XR_001837201.1|	8	81.03	N/A	gi|294345401|ref|NR_033453.1|	20	91.67	Mus musculus RIKEN cDNA 9130209A04 gene (9130209A04Rik), long non-coding RNA	gi|372099092|ref|NC_000084.6|	89	83.0833	Mus musculus strain C57BL/6J chromosome 18, GRCm38.p4 C57BL/6J	0	0	0	0	gi|568815593|ref|NC_000005.10|	19	79.72	Homo sapiens chromosome 5, GRCh38.p7 Primary Assembly
HAfT1	LOC103691380_1354nt	Known LOC	LOC103691380_1354nt	gi|1046847434|ref|XR_590740.2|	100	100	N/A	gi|74193422|dbj|AK047239.1|	8	82.52	Mus musculus 10 days neonate cerebellum cDNA, RIKEN full-length enriched library, clone:B930041E19 product:unclassifiable, full insert sequence	gi|372099091|ref|NC_000085.6|	93	80.695	Mus musculus strain C57BL/6J chromosome 19, GRCm38.p4 C57BL/6J	gi|34532155|dbj|AK125891.1|	3	94.12	Homo sapiens cDNA FLJ43903 fis, clone TESTI4010211	gi|568815588|ref|NC_000010.11|	18	86.565	Homo sapiens chromosome 10, GRCh38.p7 Primary Assembly
HAfT15	LOC102552388_VariantX1_968nt	Computationally derived sequence	Cufflinks_00048965_3008nt	gi|1046894370|ref|XR_355172.3|	33	100	N/A	gi|35193123|gb|BC058624.1|	4	90.4	Mus musculus coiled-coil domain containing 36, mRNA (cDNA clone IMAGE:5716219), partial cds	gi|372099098|ref|NC_000078.6|	95	80.5025	Mus musculus strain C57BL/6J chromosome 12, GRCm38.p4 C57BL/6J	gi|21758119|dbj|AK098165.1|	4	85.09	Homo sapiens cDNA FLJ40846 fis, clone TRACH2014544	gi|568815584|ref|NC_000014.9|	13	82.23	Homo sapiens chromosome 14, GRCh38.p7 Primary Assembly
HAfT18	NOVEL lncRNA	Computationally derived sequence	Cufflinks_00036996_5428nt	gi|298904906|emb|FQ231867.1|	4	80.56	Rattus norvegicus TL0AEA67YO03 mRNA sequence	gi|74149250|dbj|AK135073.1|	4	84.96	Mus musculus adult male olfactory brain cDNA, RIKEN full-length enriched library, clone:6430570L05 product:hypothetical Phosphoenolpyruvate carboxykinase, N-terminal containing protein, full insert sequence	gi|372099108|ref|NC_000068.7|	91	77.93	Mus musculus strain C57BL/6J chromosome 2, GRCm38.p4 C57BL/6J	gi|1034671477|ref|XR_001746388.1|	2	77.65	N/A	gi|568815588|ref|NC_000010.11|	12	74.35	Homo sapiens chromosome 10, GRCh38.p7 Primary Assembly
HAfT2	LOC102549099_506nt	Computationally derived sequence	Cufflinks_00021611_1424nt	gi|672028733|ref|XR_340756.2|	28	100	N/A	gi|15929636|gb|BC015253.1|	14	89.11	Mus musculus arachidonate 8-lipoxygenase, mRNA (cDNA clone MGC:18359 IMAGE:4221815), complete cds	gi|372099106|ref|NC_000070.6|	15	90.87	Mus musculus strain C57BL/6J chromosome 4, GRCm38.p4 C57BL/6J	gi|31874823|emb|BX538330.1|	14	81.28	Homo sapiens mRNA; cDNA DKFZp686I14200 (from clone DKFZp686I14200)	gi|568815587|ref|NC_000011.10|	3	92.5	Homo sapiens chromosome 11, GRCh38.p7 Primary Assembly
HAfT17	LOC108349448_VariantX2	Known LOC	>LOC108349448_VariantX2_619nt	gi|1046818058|ref|XR_001835418.1|	100	100	N/A	gi|1039780978|ref|XR_001778223.1|	26	89.024	N/A	gi|372099103|ref|NC_000073.6|	95	83.0177	Mus musculus strain C57BL/6J chromosome 7, GRCm38.p4 C57BL/6J	0	0	0	0	0	0	0	0
HAfT11	LOC102547196_1425nt	Known LOC	LOC102547196_1425nt	gi|672031444|ref|XR_342420.2|	100	100	N/A	gi|1039791382|ref|XR_879017.2|	11	82.12	N/A	gi|372099102|ref|NC_000074.6|	84	78.64	Mus musculus strain C57BL/6J chromosome 8, GRCm38.p4 C57BL/6J	gi|31874823|emb|BX538330.1|	3	90.24	Homo sapiens mRNA; cDNA DKFZp686I14200 (from clone DKFZp686I14200)	0	0	0	0
